# Supplementary material for: Conductive nanofiltration membrane with a hydrogel coated stainless steel mesh support for electrically enhanced fouling mitigation potential
Source: Royal Society of Chemistry journal article supplement (doi:10.1039/d2ew00436d), 2022-01-01
Supplement: d2ew00436d1.pdf [file d2ew00436d1.pdf]

**Supplementary data**

**Conductive nanofiltration membrane with hydrogel coated stainless steel mesh support  
for electrically enhanced fouling mitigation potential**

Jiansuxuan Chen, Xueye Wang, Yang Li, Ruobin Dai\*, Zhiwei Wang

State Key Laboratory of Pollution Control and Resource Reuse, Shanghai Institute of Pollution  
Control and Ecological Security, School of Environmental Science and Engineering, Tongji  
University, 1239 Siping Road, Shanghai 200092, China

Submitted to *Environmental Science: Water Research & Technology* (June, 2022)

\*Corresponding Author.

Tel.: +86-21-65975669, Fax: +86-21-65980400, E-mail address: dairuobin@tongji.edu.cn (R.  
Dai)

## Calculation of the cross-linking degree of membranes

The cross-linking degree is calculated based on the structural formula of semi-aromatic polyamide (Figure 1) and the following equations:<sup>1</sup>

$$\frac{O}{N} = \frac{3x+4y}{3x+2y} \quad \backslash * \text{ MERGEFORMAT (1)}$$

where  $x$  and  $y$  are the cross-linking portion and linear portion, respectively. The O/N ratio of the polyamide layer of a membrane was directly obtained from the XPS results. As defined O/N ratio to be a constant  $a$ , then there is:

$$\text{Degree of cross-linking} = \frac{x}{x+y} \times 100\% = \frac{4-2a}{a+1} \times 100\% \backslash * \text{ MERGEFORMAT (2)}$$

(2)

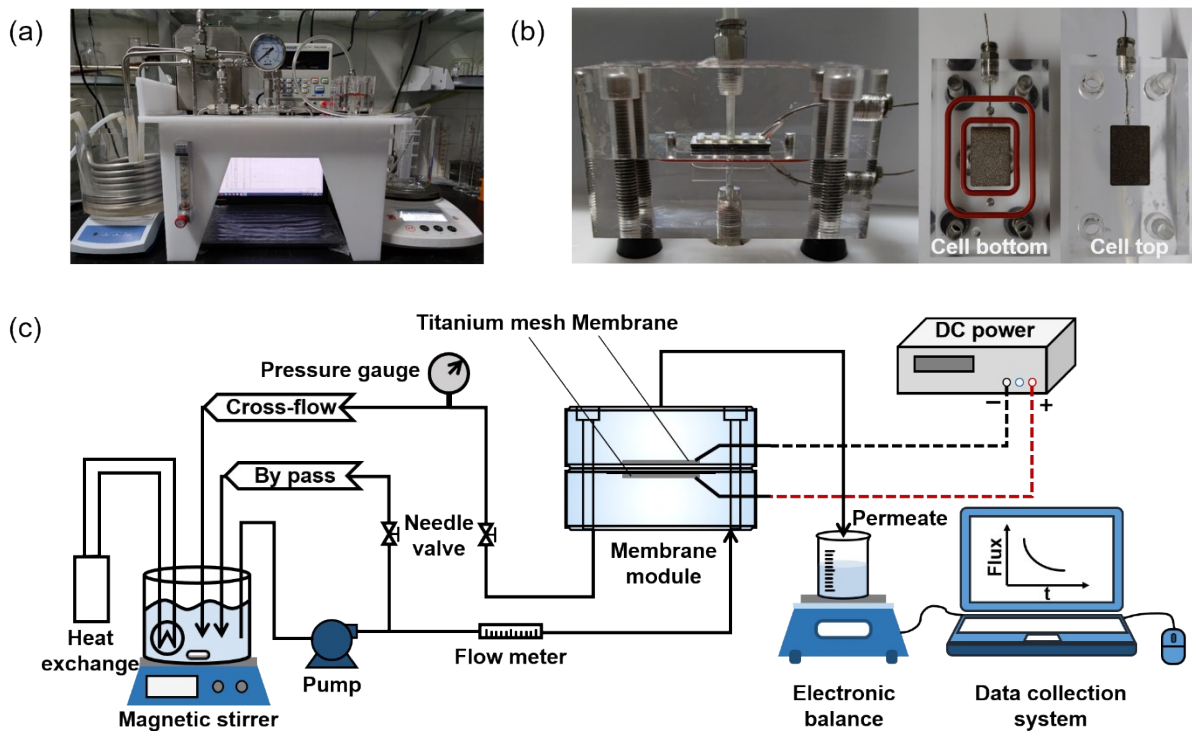

**Figure S1.** Illustration of the laboratory electrically-assisted cross-flow NF membrane filtration setup.

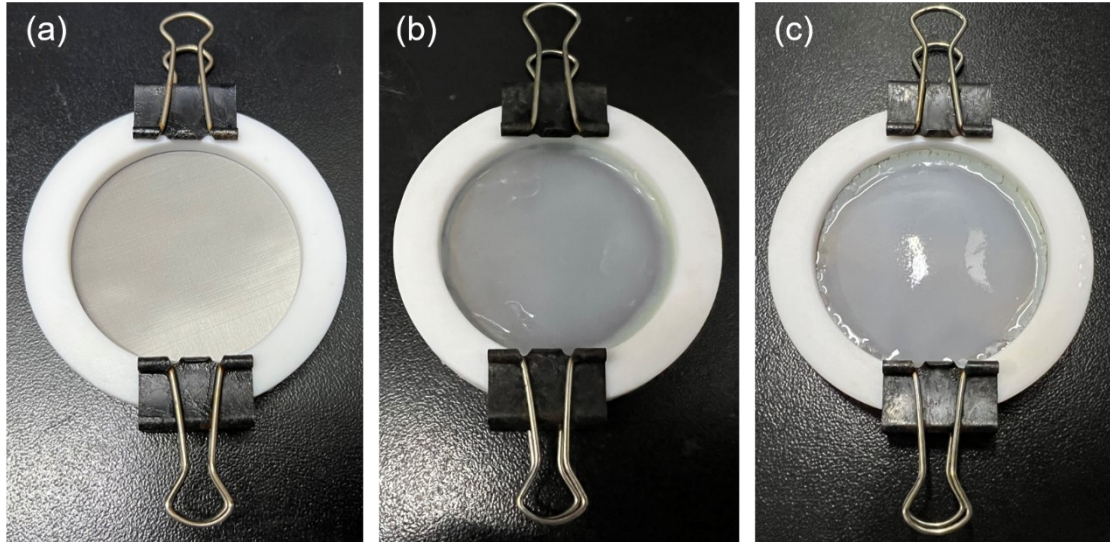

**Figure S2.** Digital images of various membranes fixed in PTFE frames: (a) SSM, (b) SSM-K, (c) SSM-K-PA.

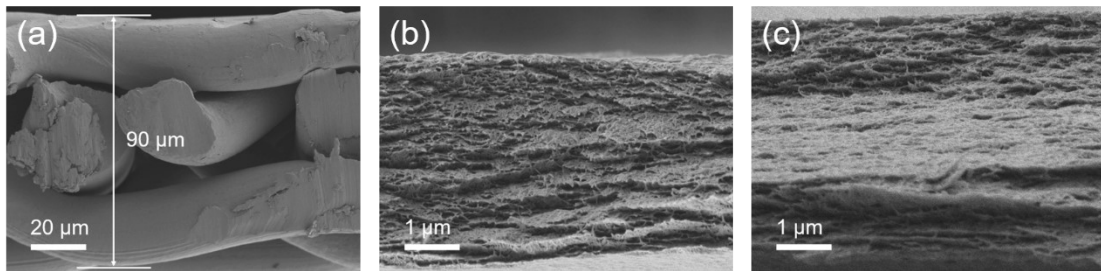

**Figure S3.** SEM images of cross-sectional morphologies of membranes: (a) SSM, (b) SSM-K, (c) SSM-K-PA.

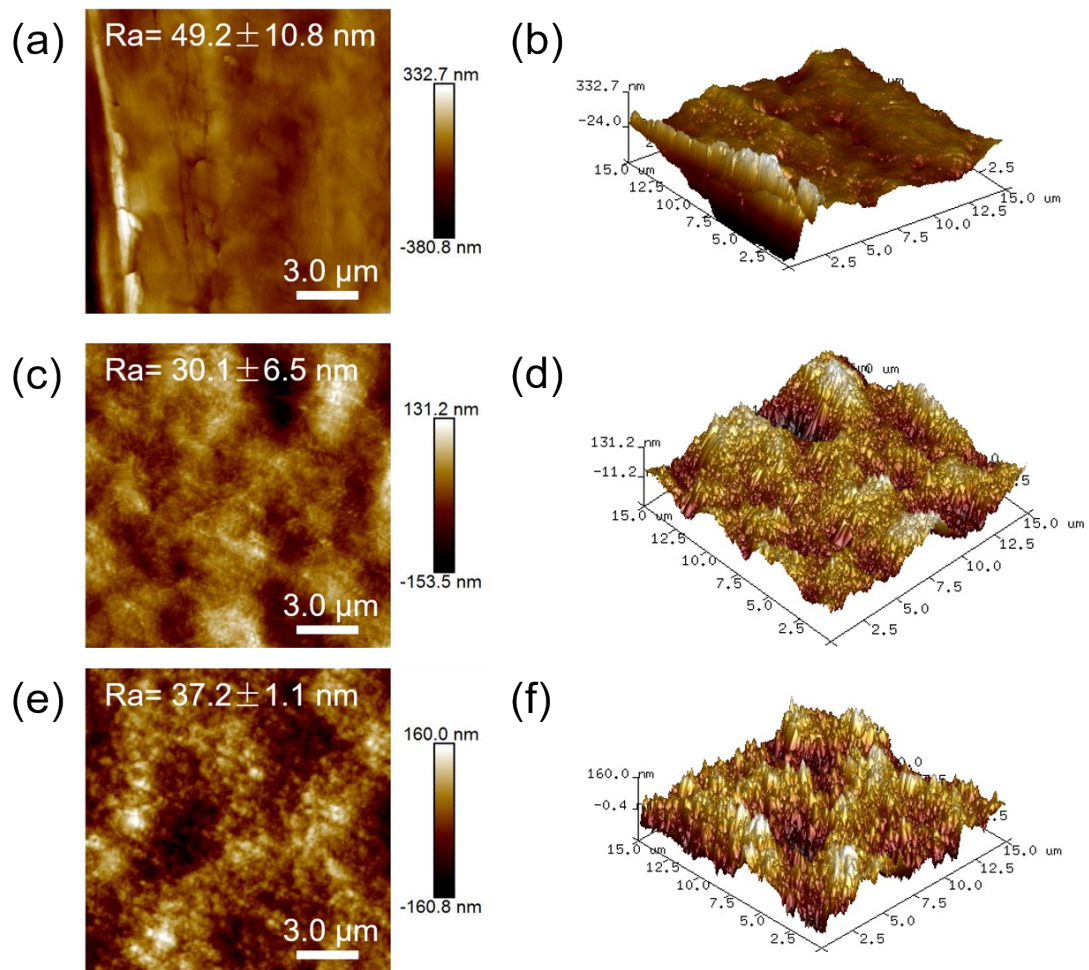

**Figure S4.** AFM reveals 2D and 3D images of surfaces of membranes: (a, b) SSM, (c, d) SSM-K, (e, f) SSM-K-PA.

**Table S1** Surface elemental compositions of SSM, SSM-K, and SSM-K-PA membrane

| Membrane | Atomic composition (%) |       |       |      |      |      |      |      |
|----------|------------------------|-------|-------|------|------|------|------|------|
|          | C                      | N     | O     | Fe   | Mn   | Cr   | Ni   | Si   |
| SSM      | 37.51                  | 2.22  | 39.1  | 2.71 | 1.87 | 6.17 | 0.93 | 9.47 |
| SSM-K    | 76.61                  | 10.52 | 11.34 | 0.21 | 0.2  | 0.23 | 0.17 | 0.71 |
| SSM-K-PA | 70.7                   | 13.52 | 14.39 | 0.23 | 0.17 | 0.23 | 0.17 | 0.59 |

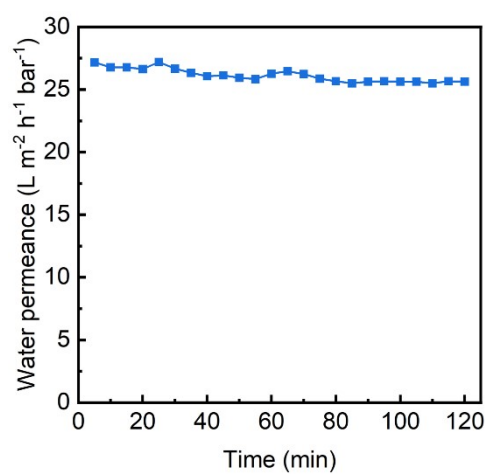

**Figure S5.** Water permeance of SSM-K-PA during pre-compaction in 2 h.

**Table S2** Performance comparison among various NF membranes.

| <b>Membranes</b>                       | <b>Water permeance<br/>(L m<sup>-2</sup> h<sup>-1</sup> bar<sup>-1</sup>)</b> | <b>Na<sub>2</sub>SO<sub>4</sub><br/>Rejection (%)</b> | <b>Ref.</b> |
|----------------------------------------|-------------------------------------------------------------------------------|-------------------------------------------------------|-------------|
| PIP-TMC/MoS <sub>2</sub> /PES UF       | ~ 15                                                                          | 98.8                                                  | 2           |
| PIP-TMC/TA-Fe/PSF UF                   | 19.6 ± 0.5                                                                    | ~95                                                   | 3           |
| PIP-TMC/PDA/PEI/PSF UF                 | 9.8                                                                           | 96.8                                                  | 4           |
| PIP-TMC/MWCNTs/PES MF                  | 17.6                                                                          | ~95                                                   | 5           |
| PIP-TMC/PDA-COF/PAN UF                 | 20.7                                                                          | 93.4                                                  | 6           |
| COF/PIP-TMC /PES UF                    | 19.3                                                                          | >80                                                   | 7           |
| BHTTM/PIP-TMC/PSF UF                   | 13.2                                                                          | 99.5                                                  | 8           |
| PAMAM/SiO <sub>2</sub> /PIP-TMC/PSF UF | 6.4                                                                           | 92                                                    | 9           |
| PIP-TMC/PD/PES UF                      | 11.4                                                                          | 93.5                                                  | 10          |
| PIP-TMC/NH <sub>2</sub> -TNTs/PSF UF   | 7.5                                                                           | 96.4                                                  | 11          |
| PIP-TMC/CNTs/PES MF                    | 21                                                                            | 98.5                                                  | 12          |
| DCH-TMC/PSF UF                         | 7.4                                                                           | 98.1                                                  | 13          |
| BPF/PIP-TMC/PES UF                     | 12.0 ± 0.2                                                                    | 96.6 ± 1.1                                            | 14          |

## References

- 1 Z.-M. Zhan, Z.-L. Xu, K.-K. Zhu, S.-M. Xue, C.-H. Ji, B.-Q. Huang, C. Y. Tang and Y.-J. Tang, Superior nanofiltration membranes with gradient cross-linked selective layer fabricated via controlled hydrolysis, *Journal of Membrane Science*, 2020, **604**, 118067.
- 2 R. Dai, H. Han, T. Wang, X. Li and Z. Wang, Enhanced removal of hydrophobic endocrine disrupting compounds from wastewater by nanofiltration membranes intercalated with hydrophilic MoS<sub>2</sub> nanosheets: Role of surface properties and internal nanochannels, *Journal of Membrane Science*, 2021, **628**, 119267.
- 3 Z. Yang, Z. Zhou, H. Guo, Z. Yao, X. Ma, X. Song, S.-P. Feng and C. Y. Tang, Tannic Acid/Fe<sup>3+</sup> Nanoscaffold for Interfacial Polymerization: Toward Enhanced Nanofiltration Performance, *Environ. Sci. Technol.*, 2018, **52**, 9341–9349.
- 4 X. Yang, Y. Du, X. Zhang, A. He and Z.-K. Xu, Nanofiltration Membrane with a Mussel-Inspired Interlayer for Improved Permeation Performance, *Langmuir*, 2017, **33**, 2318–2324.
- 5 M.-B. Wu, Y. Lv, H.-C. Yang, L.-F. Liu, X. Zhang and Z.-K. Xu, Thin film composite membranes combining carbon nanotube intermediate layer and microfiltration support for high nanofiltration performances, *Journal of Membrane Science*, 2016, **515**, 238–244.
- 6 M. Wu, J. Yuan, H. Wu, Y. Su, H. Yang, X. You, R. Zhang, X. He, N. A. Khan, R. Kasher and Z. Jiang, Ultrathin nanofiltration membrane with polydopamine-covalent organic framework interlayer for enhanced permeability and structural stability, *Journal of Membrane Science*, 2019, **576**, 131–141.
- 7 C. Wang, Z. Li, J. Chen, Z. Li, Y. Yin, L. Cao, Y. Zhong and H. Wu, Covalent organic framework modified polyamide nanofiltration membrane with enhanced performance for desalination, *Journal of Membrane Science*, 2017, **523**, 273–281.
- 8 Y.-J. Tang, Z.-L. Xu, S.-M. Xue, Y.-M. Wei and H. Yang, A chlorine-tolerant nanofiltration membrane prepared by the mixed diamine monomers of PIP and BHTTM, *Journal of Membrane Science*, 2016, **498**, 374–384.
- 9 Y.-J. Tang, Z.-L. Xu, B.-Q. Huang, Y.-M. Wei and H. Yang, Novel polyamide thin-film composite nanofiltration membrane modified with poly(amidoamine) and SiO<sub>2</sub> gel, *RSC Adv.*, 2016, **6**, 45585–45594.
- 10 Y. Li, Y. Su, J. Li, X. Zhao, R. Zhang, X. Fan, J. Zhu, Y. Ma, Y. Liu and Z. Jiang, Preparation of thin film composite nanofiltration membrane with improved structural stability through the mediation of polydopamine, *Journal of Membrane Science*, 2015, **476**, 10–19.
- 11 G. S. Lai, W. J. Lau, S. R. Gray, T. Matsuura, R. J. Gohari, M. N. Subramanian, S. O. Lai, C. S. Ong, A. F. Ismail, D. Emazadah and M. Ghanbari, A practical approach to synthesize polyamide thin film nanocomposite (TFN) membranes with improved separation properties for water/wastewater treatment, *J. Mater. Chem. A*, 2016, **4**, 4134–4144.

12 G. Gong, P. Wang, Z. Zhou and Y. Hu, New Insights into the Role of an Interlayer for the Fabrication of Highly Selective and Permeable Thin-Film Composite Nanofiltration Membrane, *ACS Appl. Mater. Interfaces*, 2019, **11**, 7349–7356.

13 G.-E. Chen, Y.-J. Liu, Z.-L. Xu, Y.-J. Tang, H.-H. Huang and L. Sun, Fabrication and characterization of a novel nanofiltration membrane by the interfacial polymerization of 1,4-diaminocyclohexane (DCH) and trimesoyl chloride (TMC), *RSC Adv.*, 2015, **5**, 40742–40752.

14 Y.-J. Tang, Z.-L. Xu, S.-M. Xue, Y.-M. Wei and H. Yang, Tailoring the polyester/polyamide backbone stiffness for the fabrication of high performance nanofiltration membrane, *Journal of Membrane Science*, 2017, **541**, 483–491.
